# Supplementary material for: キャベツ直播栽培技術の確立 (特集 春播き葉根菜類の生産技術)
Source: Royal Society of Chemistry journal article supplement (doi:10.1039/c9ra03055g), 1998-02-01
Supplement: c9ra03055g1.pdf [file c9ra03055g1.pdf]

## Supplementary Information

of

### Effect of Ta addition on the structural, thermodynamic and mechanical properties of CoCrFeNi high entropy alloys

Zhenyu Du <sup>a</sup>, Jie Zuo <sup>b,\*</sup>, Nanyun Bao <sup>a</sup>, Mingli Yang <sup>c</sup>, Gang Jiang <sup>a</sup> and Li Zhang <sup>a,\*</sup>

<sup>a</sup> Institute of Atomic and Molecular Physics, Sichuan University, Chengdu 610065, China

<sup>b</sup> College of Computer Science, Sichuan University, Chengdu 610065, China

<sup>c</sup> Research Center for Materials Genome Engineering, Sichuan University, Chengdu 610065,  
China

---

\* Corresponding authors: [jiezuo@scu.edu.cn](mailto:jiezuo@scu.edu.cn) (J. Z.) and [lizhang@scu.edu.cn](mailto:lizhang@scu.edu.cn) (L. Z.)

**Table S1** SQSs of CoCrFeNiTa<sub>x</sub> ( $x = 0.0, 0.2, 0.4, 0.6, 0.8$  and  $1.0$ ) structures containing 20/21/22/23/24/25 atoms, respectively. Lattice vectors and atomic positions are given in Cartesian coordinates in Å. Atomic positions represents the ideal, unrelaxed sites.

|                  | CoCrFeNi             |                    | CoCrFeNiTa <sub>0.2</sub> |                       |
|------------------|----------------------|--------------------|---------------------------|-----------------------|
|                  | <i>bcc</i>           | <i>fcc</i>         | <i>bcc</i>                | <i>fcc</i>            |
| Lattice vectors  | (1.5, 1.5, -0.5)     | (1.5, 0.5, 0.0)    | (1.5, -0.5, -0.5)         | (-2.0, 1.5, -0.5)     |
|                  | (1.0, -2.0, 0.0)     | (-0.5, 1.5, 0.0)   | (0.0, -2.0, 1.0)          | (1.5, -2.0, -0.5)     |
|                  | (-1.0, 0.0, -2.0)    | (0.0, 0.0, 2.0)    | (-0.5, -1.5, -2.5)        | (-1.0, -1.0, 1.0)     |
| Atomic positions | (0.0, -1.0, -2.0) Ni | (1.0, 2.0, 1.0) Ni | (0.5, -3.5, -1.5) Cr      | (-2.0, 0.0, -0.0) Ni  |
|                  | (1.0, 1.0, -2.0) Cr  | (0.0, 0.5, 1.5) Ni | (0.0, -3.0, -1.0) Co      | (-1.5, -0.5, 0.0) Ni  |
|                  | (0.5, -1.5, -1.5) Co | (1.0, 2.0, 2.0) Co | (0.0, -2.0, -2.0) Ni      | (-1.0, -1.0, 0.0) Fe  |
|                  | (1.5, 0.5, -1.5) Ni  | (0.0, 0.5, 0.5) Cr | (1.0, -3.0, -2.0) Fe      | (-1.0, -0.5, 0.5) Fe  |
|                  | (2.0, 0.0, -1.0) Fe  | (0.0, 1.0, 1.0) Cr | (0.5, -2.5, -1.5) Co      | (-0.5, -1.5, 0.0) Ni  |
|                  | (0.0, 0.0, -2.0) Fe  | (0.0, 1.5, 1.5) Co | (0.0, -2.0, -1.0) Ta      | (-0.5, -1.0, 0.5) Ta  |
|                  | (1.0, -1.0, -2.0) Cr | (0.5, 0.5, 1.0) Fe | (1.0, -3.0, -1.0) Fe      | (0.0, -2.0, 0.0) Fe   |
|                  | (0.5, -0.5, -1.5) Ni | (0.5, 1.0, 1.5) Ni | (0.5, -2.5, -0.5) Cr      | (-1.5, 0.5, 0.0) Co   |
|                  | (0.0, 0.0, -1.0) Co  | (1.0, 0.5, 1.5) Fe | (0.0, -2.0, -0.0) Ni      | (-1.0, -0.5, -0.5) Ni |
|                  | (1.0, -1.0, -1.0) Cr | (0.0, 1.0, 2.0) Cr | (1.0, -2.0, -2.0) Ni      | (-1.0, 0.0, 0.0) Cr   |
|                  | (0.5, -0.5, -0.5) Fe | (0.0, 1.5, 0.5) Fe | (0.5, -1.5, -1.5) Ni      | (-0.5, -1.0, -0.5) Cr |
|                  | (1.5, -0.5, -2.5) Cr | (0.5, 0.5, 2.0) Cr | (0.0, -1.0, -1.0) Co      | (-0.5, -0.5, 0.0) Co  |
|                  | (1.0, 0.0, -2.0) Ni  | (0.5, 1.0, 0.5) Co | (1.0, -2.0, -1.0) Ni      | (0.0, -1.0, 0.0) Fe   |
|                  | (0.5, 0.5, -1.5) Fe  | (0.5, 1.5, 1.0) Fe | (0.5, -1.5, -0.5) Cr      | (0.5, -1.5, 0.0) Co   |
|                  | (1.5, -0.5, -1.5) Ni | (1.0, 0.5, 0.5) Co | (0.0, -1.0, -0.0) Cr      | (-2.5, 0.0, 0.5) Cr   |

|                      |                    |                      |                      |
|----------------------|--------------------|----------------------|----------------------|
| (1.0, 0.0, -1.0) Co  | (1.0, 1.0, 1.0) Cr | (1.0, -2.0, -0.0) Fe | (-2.0, -0.5, 0.5) Cr |
| (0.5, 0.5, -0.5) Co  | (1.0, 1.5, 1.5) Ni | (0.0, -3.0, -2.0) Fe | (-1.5, -1.0, 0.5) Co |
| (1.5, -0.5, -0.5) Fe | (0.5, 1.5, 2.0) Co | (1.0, -1.0, -1.0) Co | (-1.0, -1.5, 0.5) Cr |
| (1.0, 1.0, -1.0) Cr  | (1.0, 1.0, 2.0) Ni | (0.5, -0.5, -0.5) Co | (-1.5, -1.5, 0.0) Ni |
| (1.5, 0.5, -0.5) Co  | (1.0, 1.5, 0.5) Fe | (1.0, -4.0, -2.0) Fe | (-0.5, -2.0, 0.5) Fe |
|                      |                    | (0.5, -2.5, -2.5) Cr | (0.0, -2.5, 0.5) Co  |

|                      | CoCrFeNiTa <sub>0.4</sub> |                       | CoCrFeNiTa <sub>0.6</sub> |                      |
|----------------------|---------------------------|-----------------------|---------------------------|----------------------|
|                      | <i>bcc</i>                | <i>fcc</i>            | <i>bcc</i>                | <i>fcc</i>           |
| Lattice vectors      | (-1.5, -1.5, 0.5)         | (0.5, 0.0, -1.5)      | (-1.5, 0.5, -1.5)         | (-0.5, 1.5, 0.0)     |
|                      | (1.5, -0.5, 1.5)          | (-1.0, 1.0, -1.0)     | (0.0, -2.0, -1.0)         | (0.0, 0.5, -1.5)     |
|                      | (-1.0, 2.0, 1.0)          | (1.0, 2.0, 0.0)       | (-2.0, -1.0, 1.0)         | (-2.5, 0.0, -0.5)    |
| Atomic positions     | (-1.0, -1.0, 1.0) Ni      | (0.5, 3.0, -2.5) Cr   | (-3.0, -2.0, -1.0) Fe     | (-2.5, 0.5, -1.0) Co |
|                      | (-1.5, -0.5, 1.5) Co      | (0.0, 0.5, -0.5) Co   | (-2.5, -2.5, -0.5) Co     | (-2.5, 1.0, -0.5) Co |
|                      | (-0.5, -1.5, 1.5) Ni      | (-0.5, 1.0, -1.5) Cr  | (-2.5, -1.5, -1.5) Ni     | (-2.0, 0.5, -0.5) Fe |
|                      | (-0.5, -0.5, 0.5) Cr      | (-0.5, 1.5, -1.0) Co  | (-3.0, -1.0, -1.0) Ta     | (-2.5, 1.0, -1.5) Fe |
|                      | (-1.0, 0.0, 1.0) Cr       | (0.0, 0.5, -1.5) Cr   | (-2.0, -2.0, -1.0) Ni     | (-2.5, 1.5, -1.0) Co |
|                      | (-1.5, 0.5, 1.5) Cr       | (0.0, 1.0, -1.0) Ni   | (-2.5, -1.5, -0.5) Ni     | (-2.0, 0.5, -1.5) Ni |
|                      | (-1.0, 1.0, 2.0) Fe       | (0.5, 1.5, -2.0) Cr   | (-1.5, -2.5, -0.5) Co     | (-2.0, 1.0, -1.0) Fe |
|                      | (-0.5, -0.5, 1.5) Fe      | (0.5, 0.5, -1.0) Co   | (-2.0, -2.0, -0.0) Fe     | (-2.0, 1.5, -0.5) Cr |
|                      | (-1.0, 0.0, 2.0) Fe       | (0.5, 1.0, -0.5) Ni   | (-1.5, -1.5, -1.5) Ta     | (-1.5, 0.5, -1.0) Ta |
|                      | (0.0, -1.0, 2.0) Ta       | (0.0, 1.0, -2.0) Fe   | (-2.0, -1.0, -1.0) Co     | (-1.5, 1.0, -0.5) Ni |
| (-0.5, -0.5, 2.5) Ni | (0.0, 1.5, -1.5) Ni       | (-2.5, -0.5, -0.5) Cr | (-1.0, 0.5, -0.5) Ta      |                      |

---

|                     |                     |                       |                      |
|---------------------|---------------------|-----------------------|----------------------|
| (-1.0, 0.0, 3.0) Cr | (0.0, 2.0, -1.0) Fe | (-1.0, -2.0, -1.0) Ni | (-3.0, 2.0, -2.0) Cr |
| (-0.5, 0.5, 0.5) Ni | (0.5, 1.0, -1.5) Ta | (-1.5, -1.5, -0.5) Fe | (-2.0, 1.5, -1.5) Fe |
| (-1.0, 1.0, 1.0) Co | (0.5, 1.5, -1.0) Fe | (-2.0, -1.0, -0.0) Co | (-1.5, 1.0, -1.5) Fe |
| (0.0, 0.0, 1.0) Ni  | (0.5, 2.0, -0.5) Cr | (-1.5, -0.5, -1.5) Fe | (-1.5, 1.5, -1.0) Cr |
| (-0.5, 0.5, 1.5) Co | (0.0, 2.0, -2.0) Fe | (-2.0, 0.0, -1.0) Cr  | (-1.0, 0.5, -1.5) Ni |
| (0.5, -0.5, 1.5) Fe | (0.0, 2.5, -1.5) Fe | (-1.0, -1.0, -1.0) Cr | (-1.0, 1.0, -1.0) Cr |
| (0.0, 0.0, 2.0) Fe  | (0.5, 2.0, -1.5) Co | (-1.5, -0.5, -0.5) Co | (-1.0, 1.5, -0.5) Ni |
| (-0.5, 0.5, 2.5) Co | (0.5, 2.5, -1.0) Ta | (-0.5, -1.5, -0.5) Cr | (-0.5, 0.5, -1.0) Ni |
| (-0.5, 1.5, 1.5) Ta | (1.0, 1.5, -1.5) Ni | (-1.0, -1.0, -0.0) Fe | (-0.5, 1.0, -0.5) Co |
| (0.5, 0.5, 1.5) Cr  | (1.0, 2.0, -1.0) Co | (-1.0, 0.0, -1.0) Ta  | (-1.0, 1.5, -1.5) Co |
| (0.0, 1.0, 2.0) Co  | (0.5, 2.5, -2) Ni   | (-0.5, -0.5, -0.5) Ni | (-0.5, 1.0, -1.5) Cr |
|                     |                     | (-3.5, -2.5, -1.5) Cr | (-0.5, 1.5, -1.0) Ta |

---

|                  | CoCrFeNiTa <sub>0.8</sub> |                      | CoCrFeNiTa <sub>1.0</sub> |                     |
|------------------|---------------------------|----------------------|---------------------------|---------------------|
|                  | <i>bcc</i>                | <i>fcc</i>           | <i>bcc</i>                | <i>fcc</i>          |
| Lattice vectors  | (-1.0, -1.0, -2.0)        | (1.5, 0.0, 0.5)      | (-1.0, 2.0, 1.0)          | (1.0, -1.0, -1.0)   |
|                  | (-1.0, 2.0, 1.0)          | (-0.5, -1.5, 0.0)    | (-2.0, -1.0, 1.0)         | (1.5, -0.5, 1.0)    |
|                  | (2.0, 1.0, -1.0)          | (0.5, 0.0, -2.5)     | (1.5, -0.5, 1.5)          | (-0.5, -2.0, 0.5)   |
| Atomic positions | (-0.5, -0.5, -1.5) Co     | (0.0, -1.0, 0.0) Fe  | (-1.5, -0.5, 1.5) Cr      | (1.5, -2.5, 1.0) Ta |
|                  | (1.0, 1.0, -2.0) Ta       | (0.0, -1.0, -1.0) Ni | (-2.0, 0.0, 2.0) Ta       | (0.0, -1.5, 0.5) Co |
|                  | (0.0, 0.0, -2.0) Co       | (0.0, -0.5, -0.5) Fe | (-1.0, -1.0, 2.0) Ni      | (0.5, -2.5, 0.0) Cr |
|                  | (-0.5, 0.5, -1.50) Ni     | (1.5, -1.5, -2.0) Fe | (-1.0, 0.0, 1.0) Fe       | (0.5, -2.0, 0.5) Co |
|                  | (-1.0, 1.0, -1.0) Cr      | (0.5, -1.0, -0.5) Co | (-1.5, 0.5, 1.5) Cr       | (1.0, -3.0, 0.0) Co |

---

---

|                      |                      |                      |                     |
|----------------------|----------------------|----------------------|---------------------|
| (0.0, 0.0, -1.0) Fe  | (0.5, -0.5, -0.0) Cr | (-2.0, 1.0, 2.0) Ta  | (1.0, -2.5, 0.5) Ta |
| (-0.5, 0.5, -0.5) Fe | (1.0, -1.0, -0.0) Ni | (-0.5, -0.5, 1.5) Ta | (1.0, -2.0, 1.0) Cr |
| (1.0, 2.0, -1.0) Fe  | (0.5, -1.0, -1.5) Ta | (-1.0, 0.0, 2.0) Ni  | (1.5, -3.0, 0.5) Cr |
| (0.0, 2.0, -2.0) Co  | (0.5, -0.5, -1.0) Co | (-1.5, 0.5, 2.5) Co  | (1.5, -1.5, 1.0) Co |
| (0.5, 0.5, -2.5) Ni  | (0.0, -1.5, -0.5) Ta | (0.0, -1.0, 2.0) Co  | (2.0, -2.5, 0.5) Fe |
| (0.0, 1.0, -2.0) Co  | (1.0, -1.0, -1.0) Cr | (-0.5, -0.5, 2.5) Fe | (0.5, -1.5, 0.0) Cr |
| (-0.5, 1.5, -1.5) Ta | (0.5, -0.5, -2.0) Ni | (-1.0, 0.0, 3.0) Cr  | (0.5, -1.0, 0.5) Ni |
| (0.5, 0.5, -1.5) Ni  | (0.0, -1.5, -1.5) Ni | (-1.5, 0.5, 3.5) Ni  | (1.0, -2.0, 0.0) Fe |
| (-0.0, 1.0, -1.0) Fe | (1.0, -1.0, -2.0) Co | (-0.5, 0.5, 0.5) Fe  | (1.0, -1.5, 0.5) Ni |
| (-0.5, 1.5, -0.5) Cr | (1.0, -0.5, -1.5) Ta | (-1.0, 1.0, 1.0) Ni  | (1.5, -2.5, 0.0) Fe |
| (0.5, 0.5, -0.5) Co  | (0.5, -1.5, -1.0) Fe | (-1.5, 1.5, 1.5) Ni  | (1.5, -2.0, 0.5) Ni |
| (0.0, 1.0, 0.0) Ni   | (1.5, -1.0, -1.5) Co | (0.0, 0.0, 1.0) Fe   | (2.0, -3.5, 0.5) Cr |
| (-0.5, 1.5, 0.5) Cr  | (1.0, -0.5, -1.5) Ta | (-0.5, 0.5, 1.5) Ta  | (2.0, -1.5, 0.5) Ta |
| (0.5, 1.5, -1.5) Ta  | (0.5, -1.5, -1.0) Fe | (-1.0, 1.0, 2.0) Co  | (0.5, -0.5, 0.0) Fe |
| (0.0, 2.0, -1.0) Ni  | (1.5, -0.5, -1.0) Co | (0.5, -0.5, 1.5) Co  | (1.0, -1.5, 0.0) Co |
| (1.0, 1.0, -1.0) Fe  | (1.0, -1.5, -0.5) Fe | (0.0, 0.0, 2.0) Ta   | (1.0, -1.0, 0.0) Fe |
| (0.5, 1.5, -0.5) Ta  | (0.5, -1.5, -2.0) Cr | (-0.5, 0.5, 2.5) Cr  | (1.0, -0.5, 0.5) Ni |
| (0.0, 2.0, 0.0) Cr   | (1.5, -0.5, -2.0) Ni | (-0.5, 1.5, 1.5) Cr  | (1.5, -1.5, 0.0) Ni |
| (0.5, 2.5, -0.5) Cr  | (1.0, -1.5, -1.5) Cr | (0.5, 0.5, 1.5) Co   | (1.5, -1.0, 0.5) Ta |
|                      |                      | (0.0, 1.0, 2.0) Fe   | (2.0, -2.0, 0.0) Ta |

---

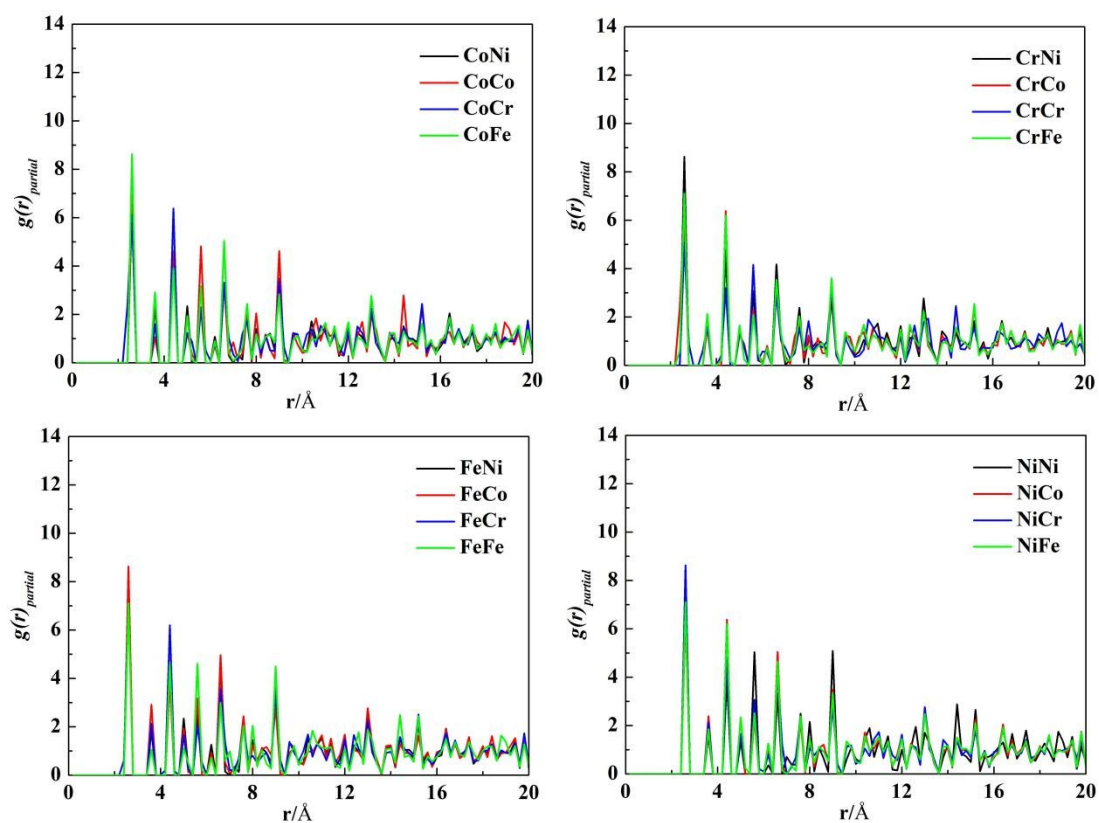

**Fig. S1** Partial pair distribution function of *fcc* CoCrFeNi alloy.

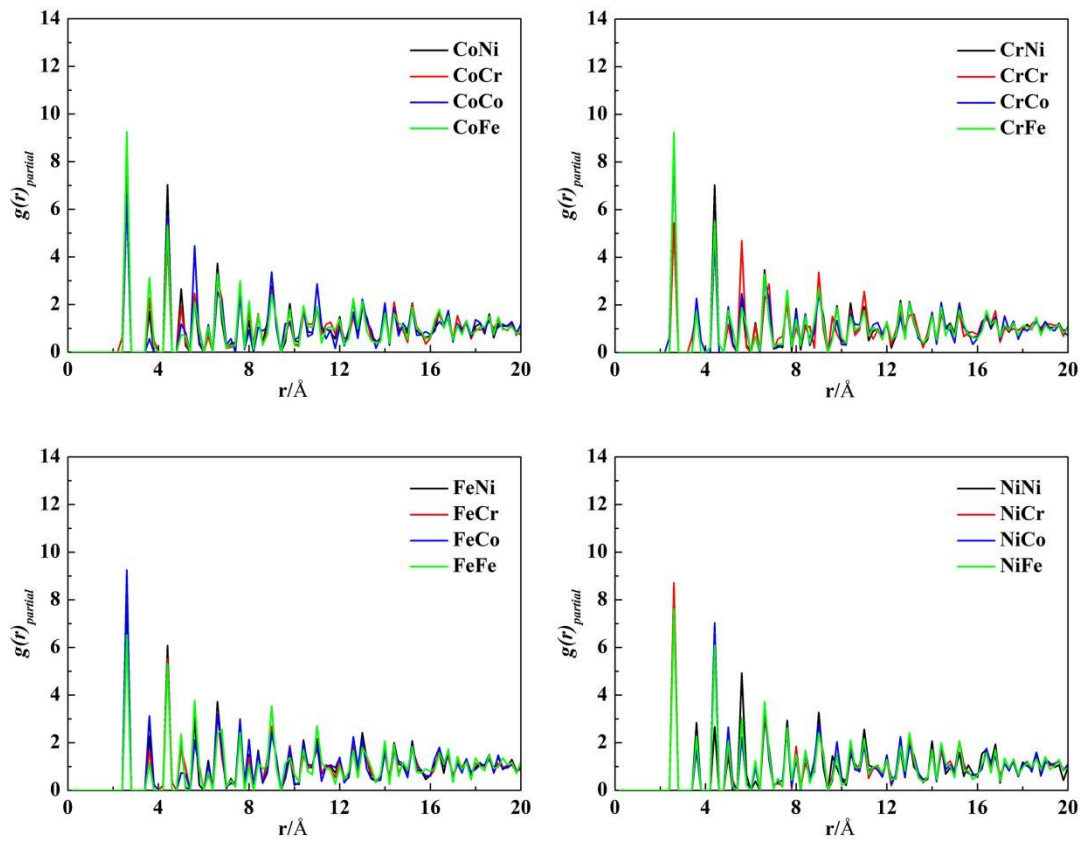

**Fig. S2** Partial pair distribution function of *bcc* CoCrFeNi alloy.

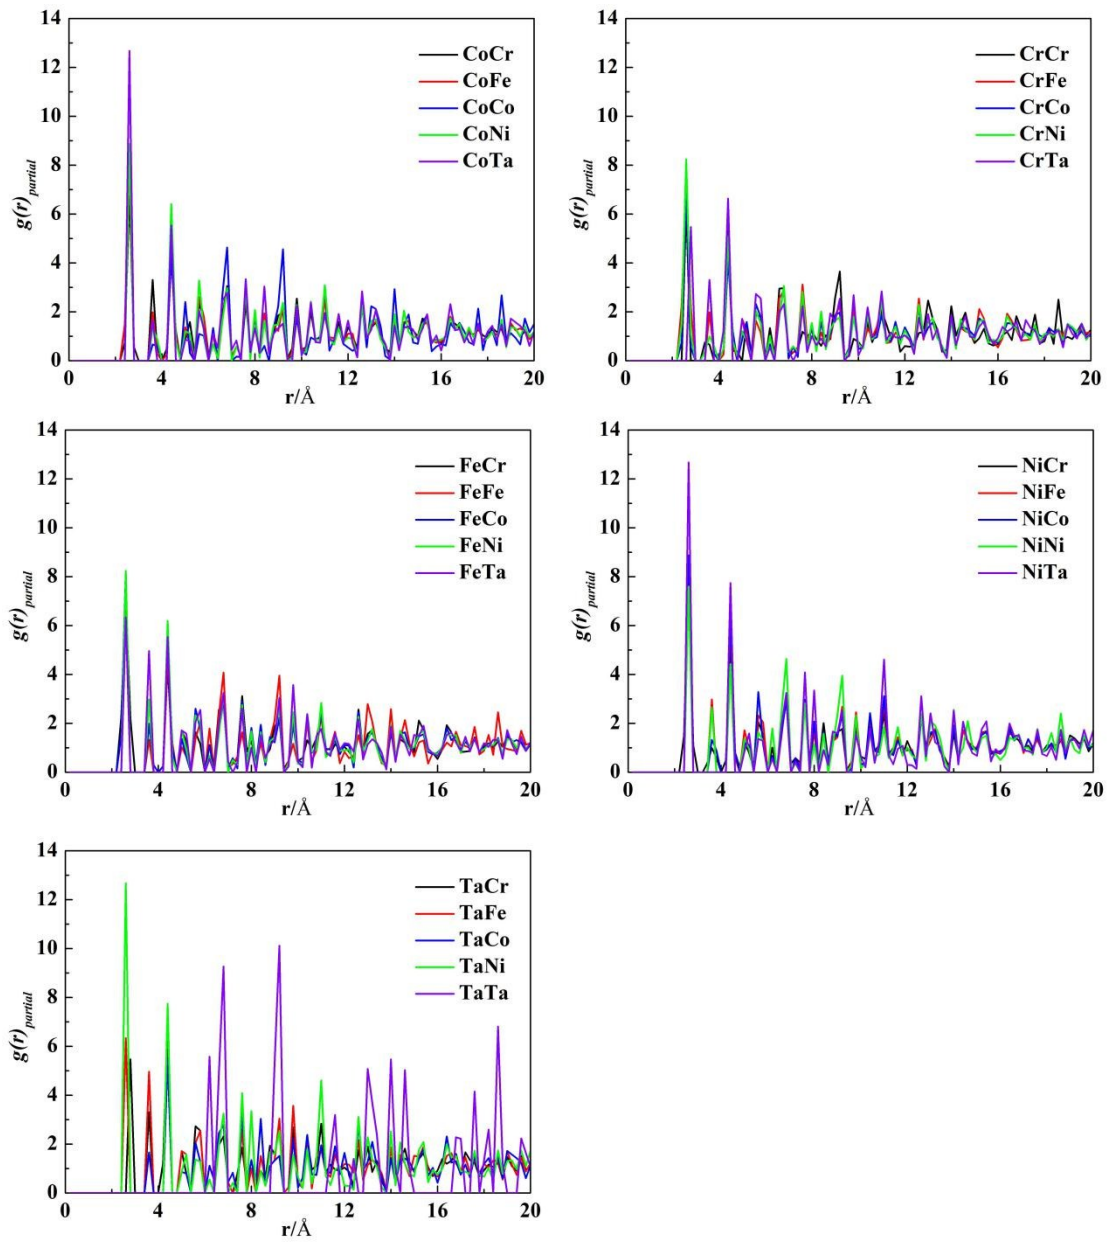

**Fig. S3** Partial pair distribution function of  $fcc$   $\text{CoCrFeNiTa}_{0.2}$  alloy.



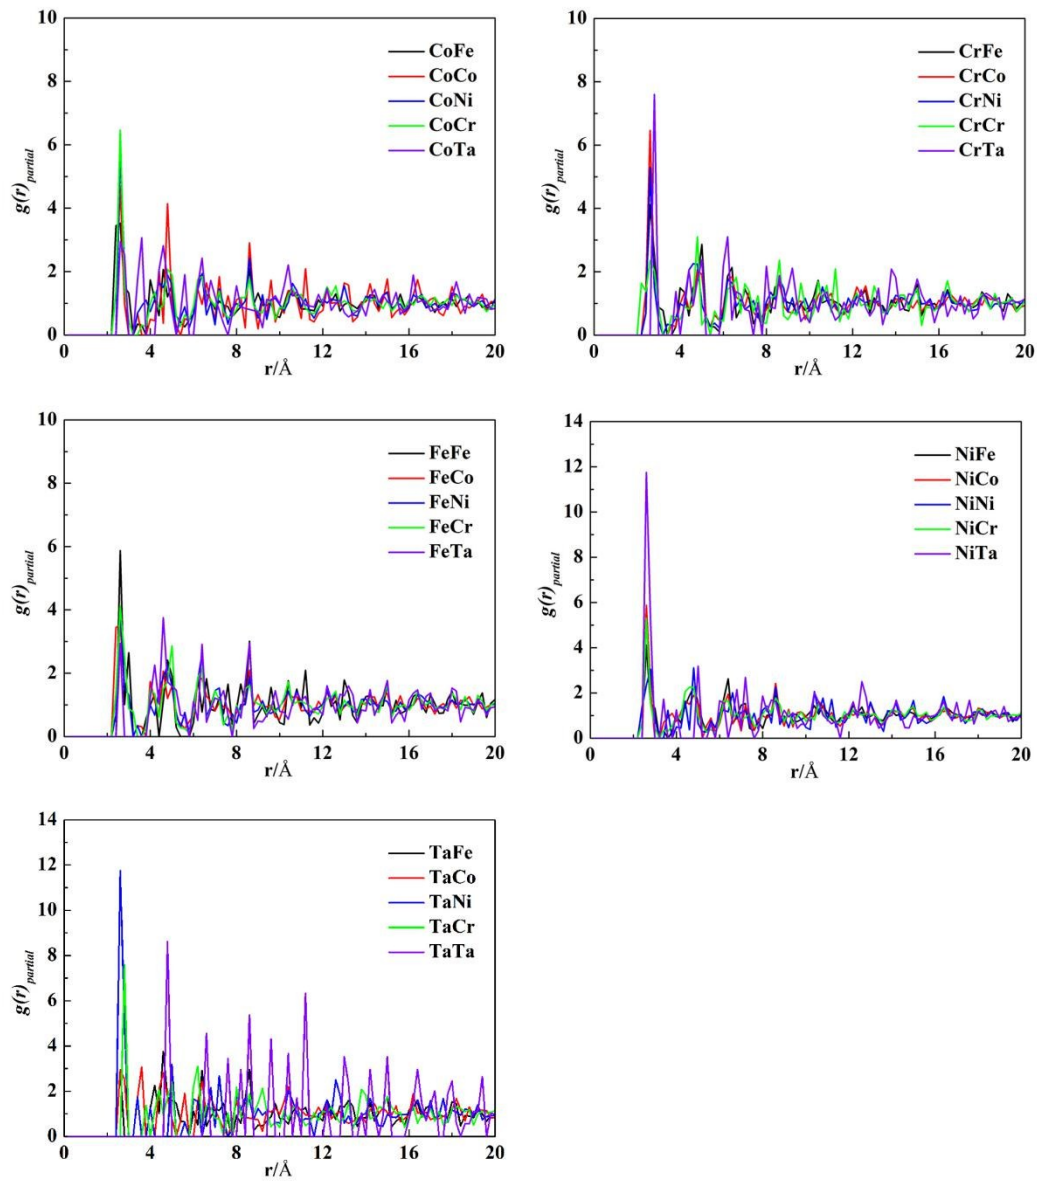

**Fig. S4** Partial pair distribution function of *bcc* CoCrFeNiTa<sub>0.2</sub> alloy.

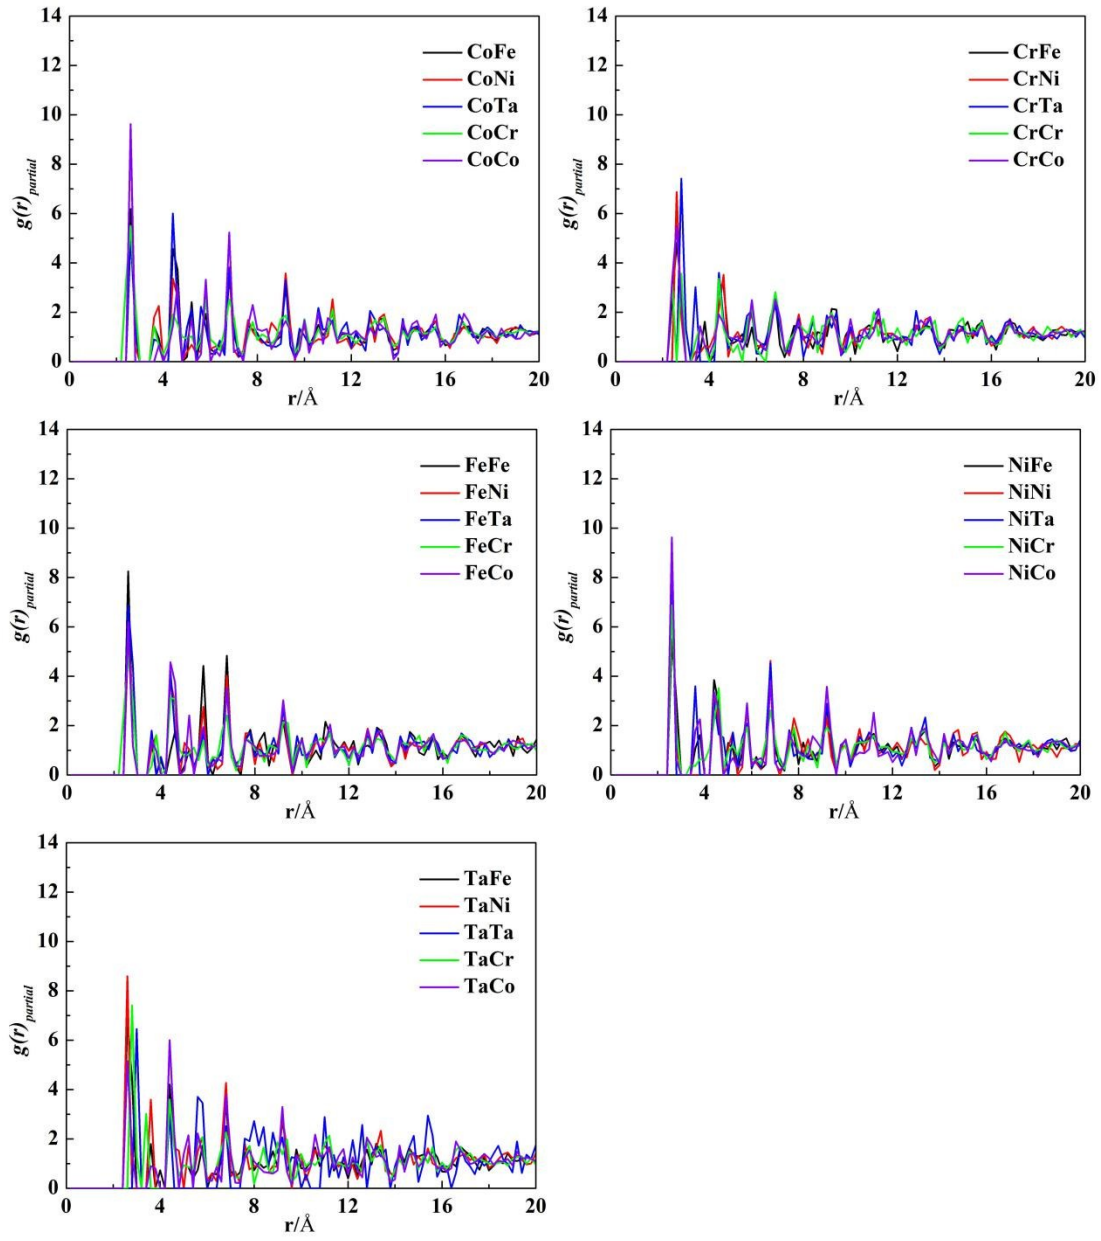

**Fig. S5** Partial pair distribution function of  $fcc$   $\text{CoCrFeNiTa}_{0.4}$  alloy.

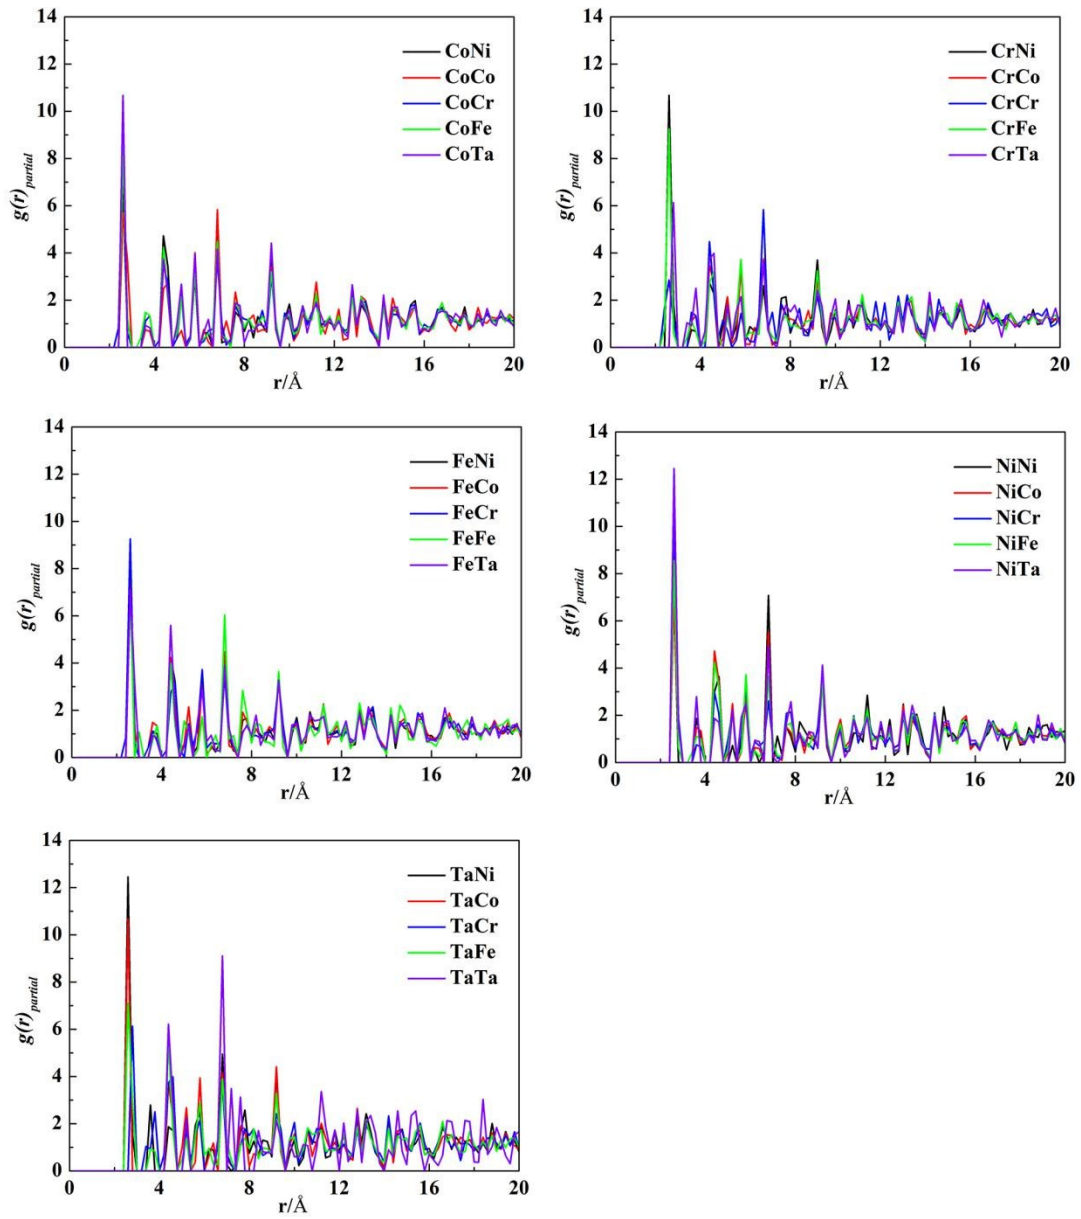

**Fig. S6** Partial pair distribution function of  $bcc$   $\text{CoCrFeNiTa}_{0.4}$  alloy.

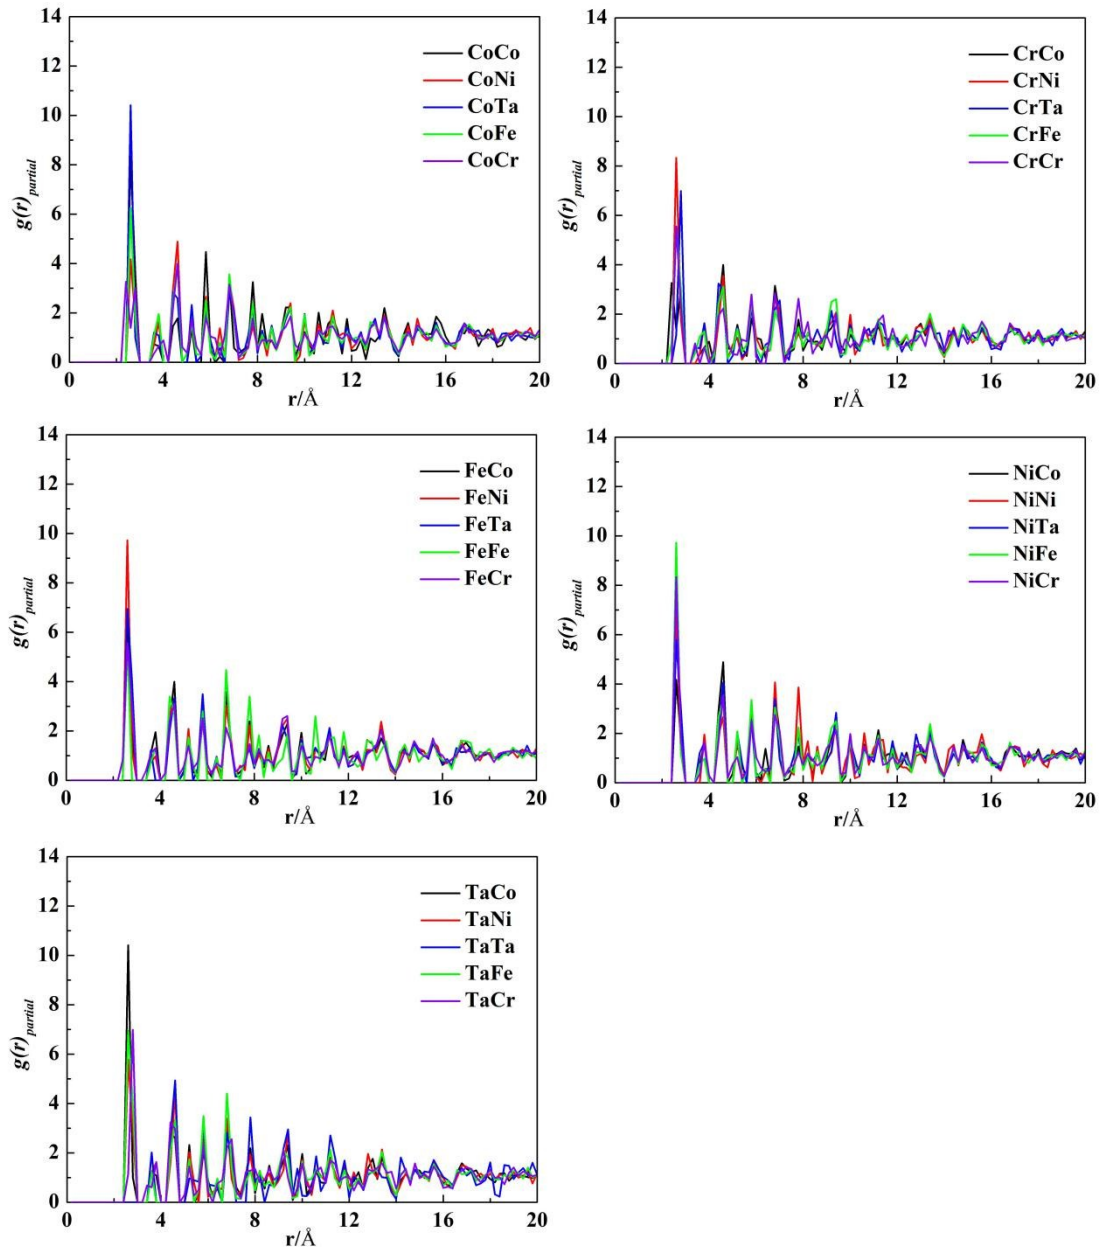

**Fig. S7** Partial pair distribution function of *fcc* CoCrFeNiTa<sub>0.6</sub> alloy.

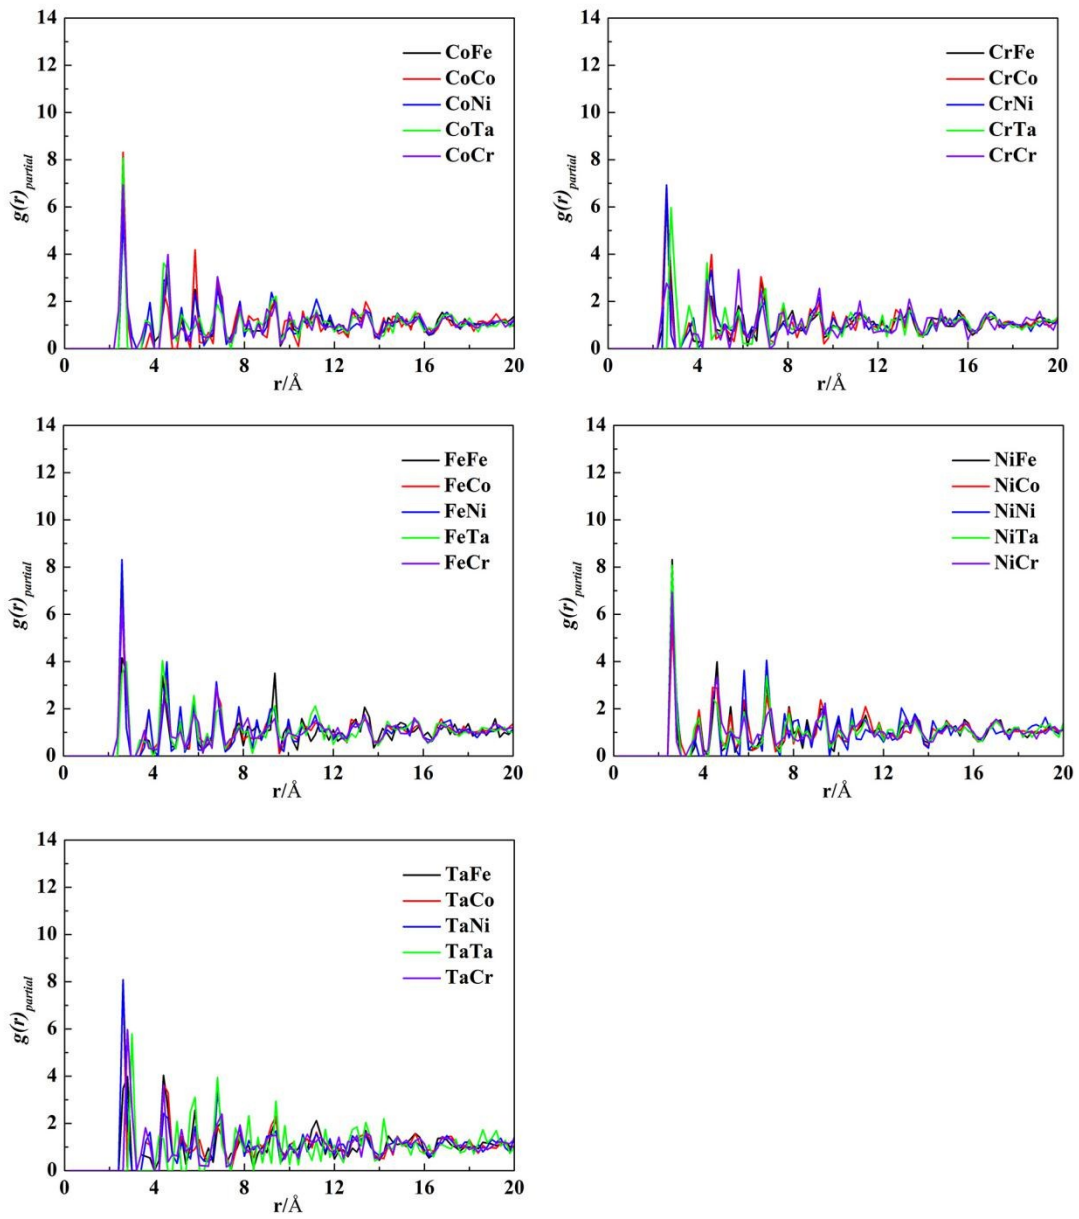

**Fig. S8** Partial pair distribution function of *bcc* CoCrFeNiTa<sub>0.6</sub> alloy.

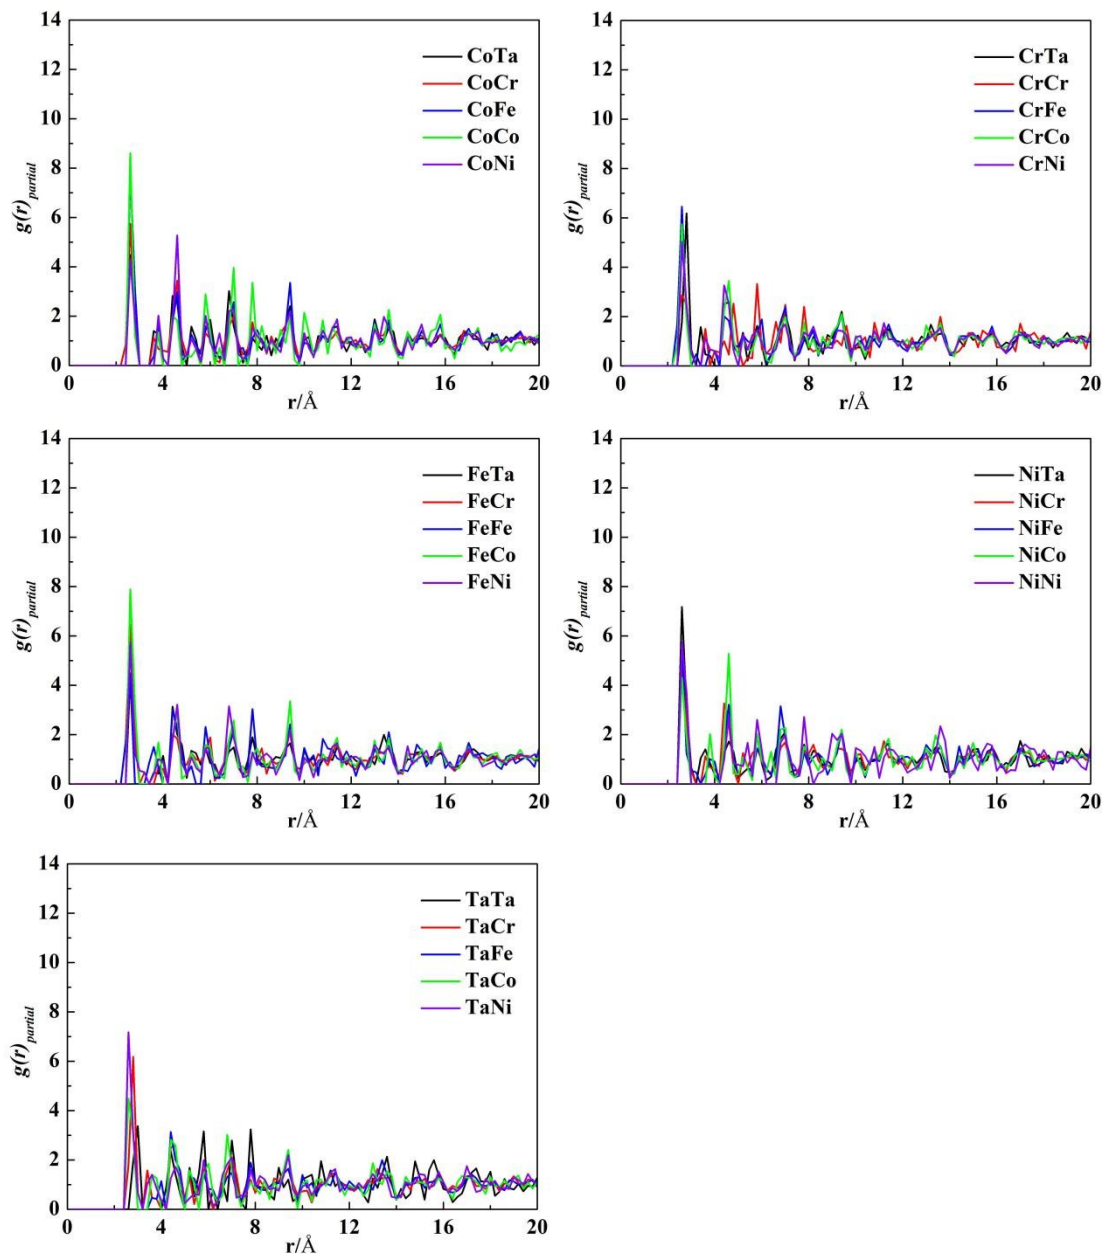

**Fig. S9** Partial pair distribution function of  $fcc$   $\text{CoCrFeNiTa}_{0.8}$  alloy.

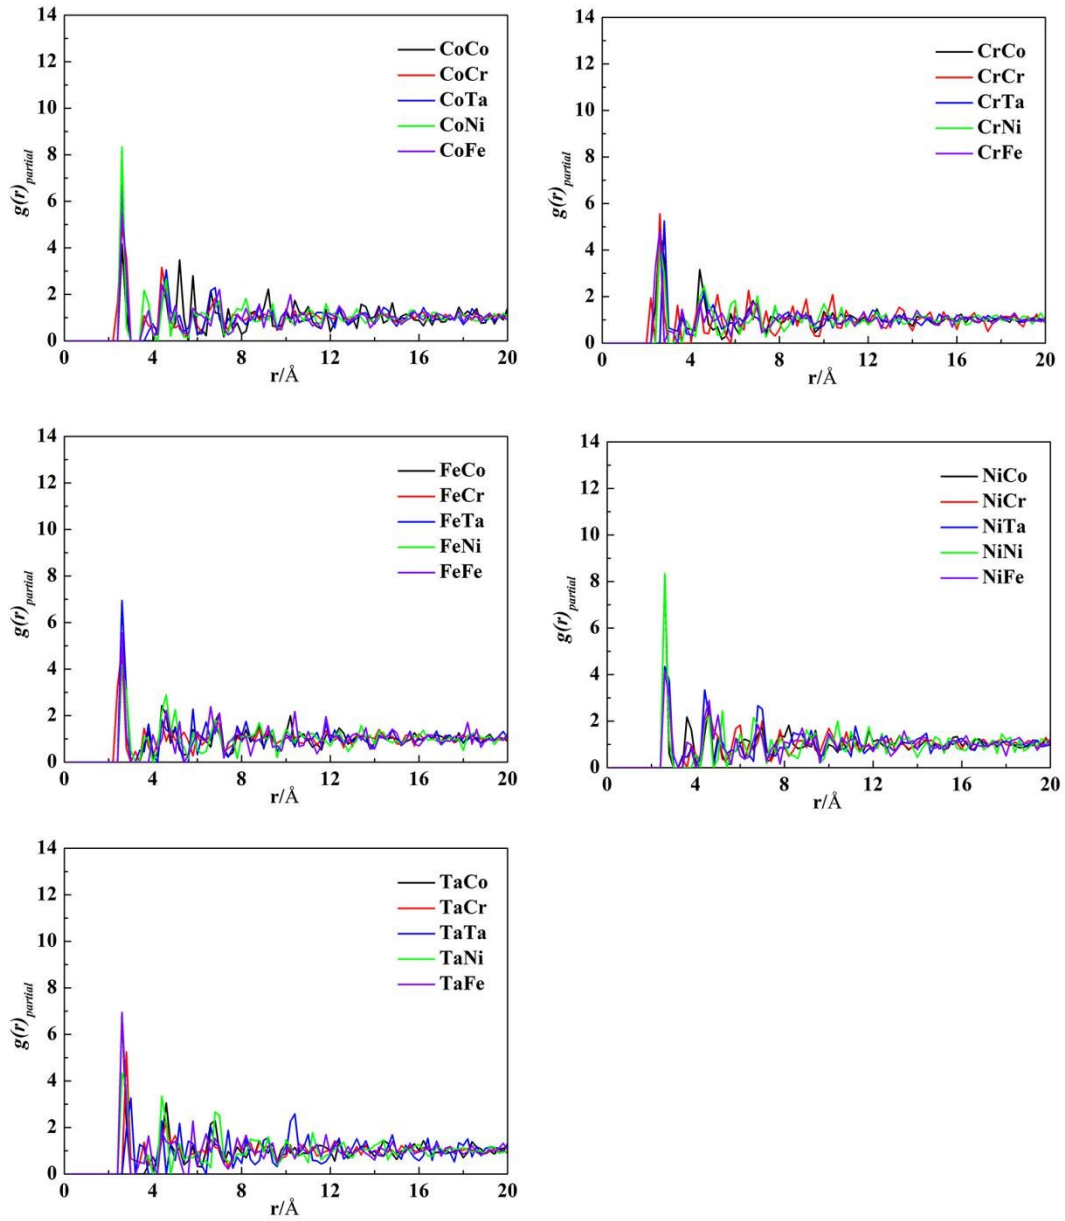

**Fig. S10** Partial pair distribution function of *bcc* CoCrFeNiTa<sub>0.8</sub> alloy.

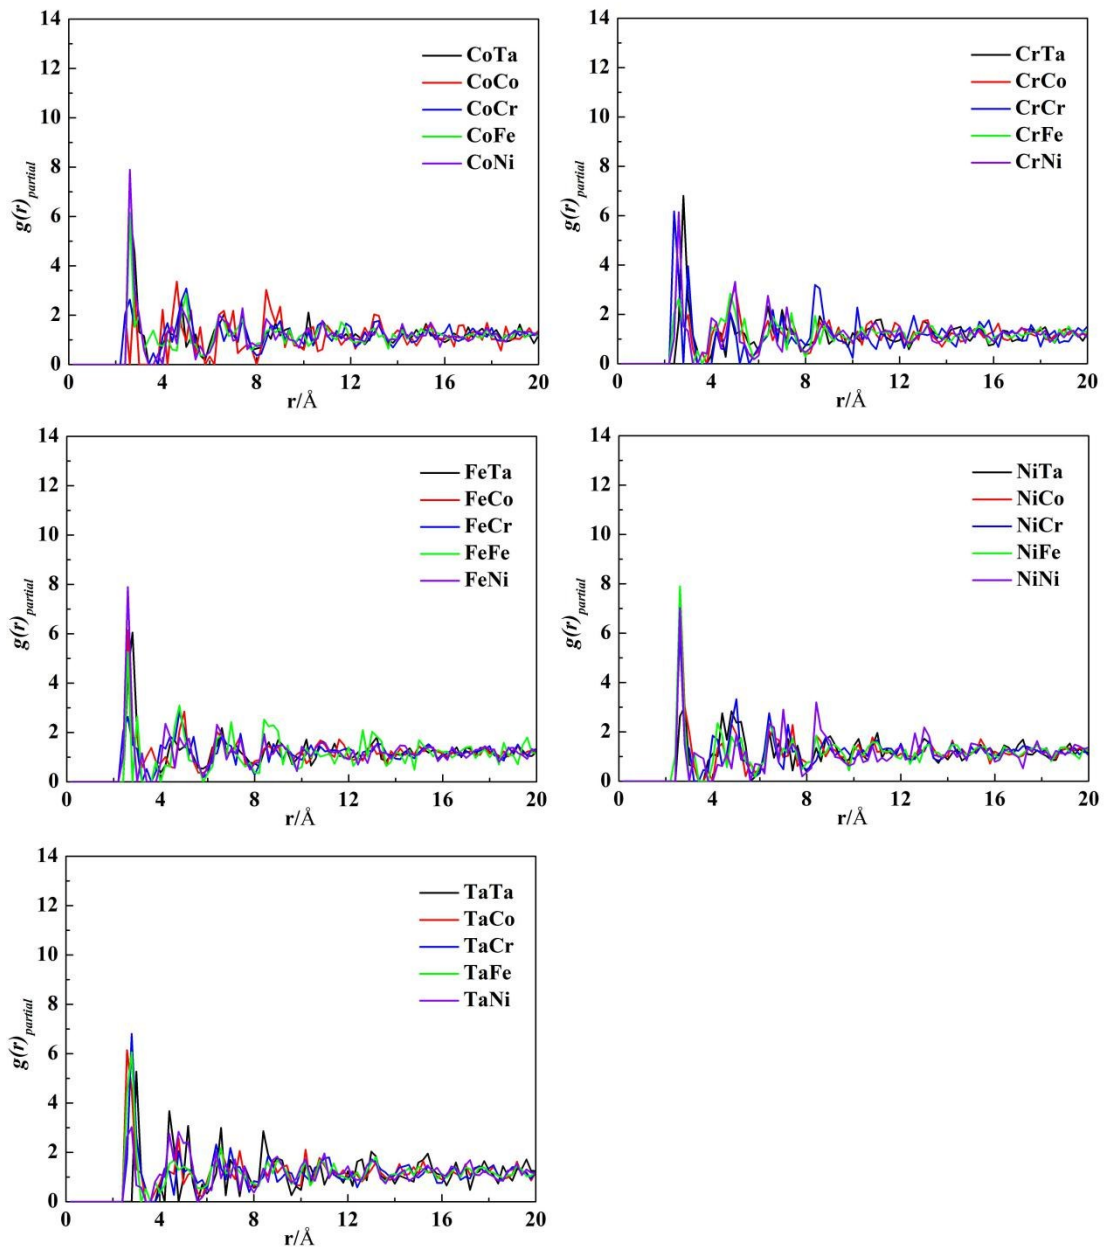

**Fig. S11** Partial pair distribution function of *fcc* CoCrFeNiTa<sub>1.0</sub> alloy.



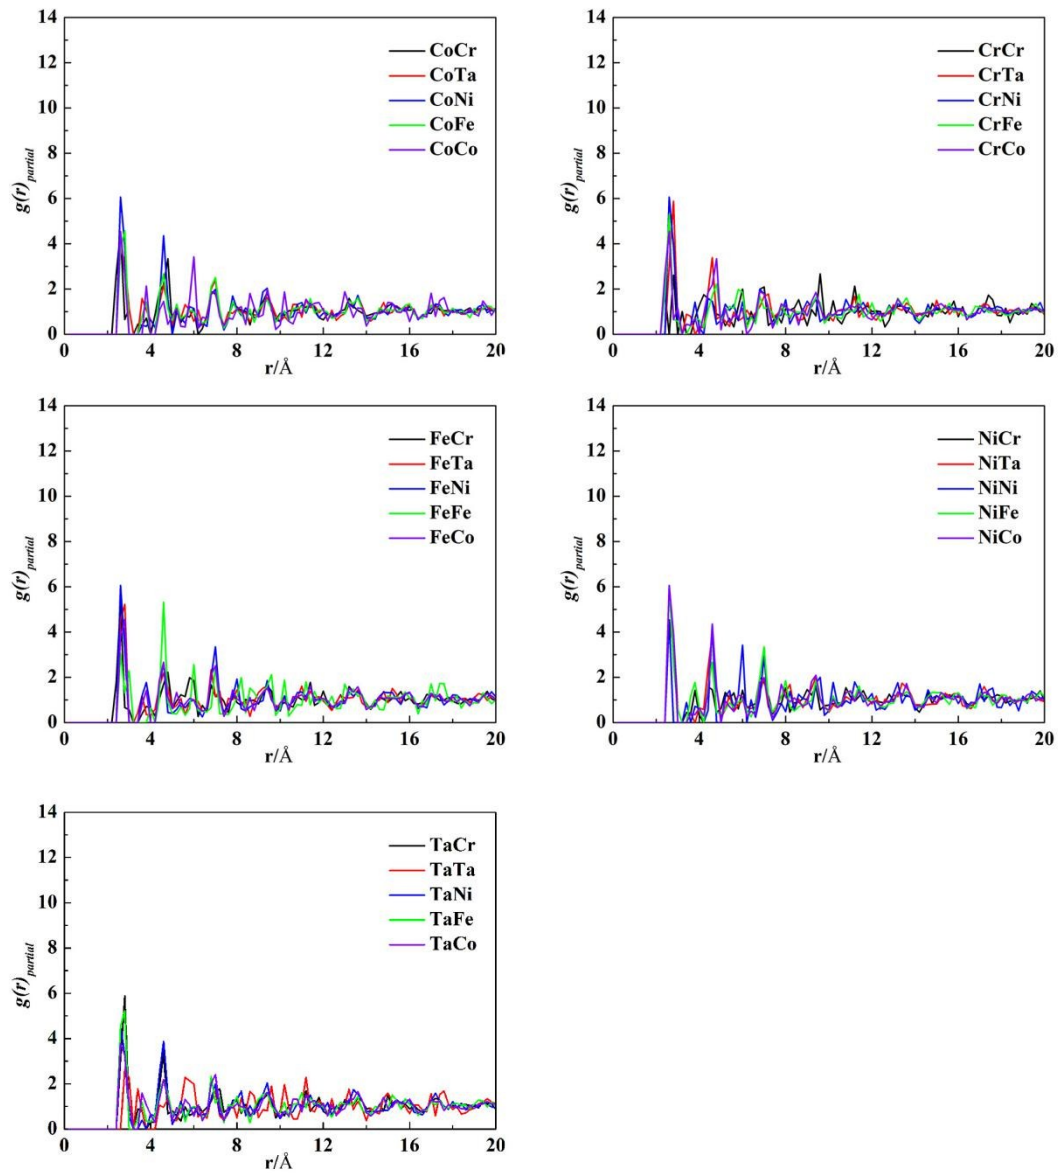

**Fig. S12** Partial pair distribution function of *bcc* CoCrFeNiTa<sub>1.0</sub> alloy.

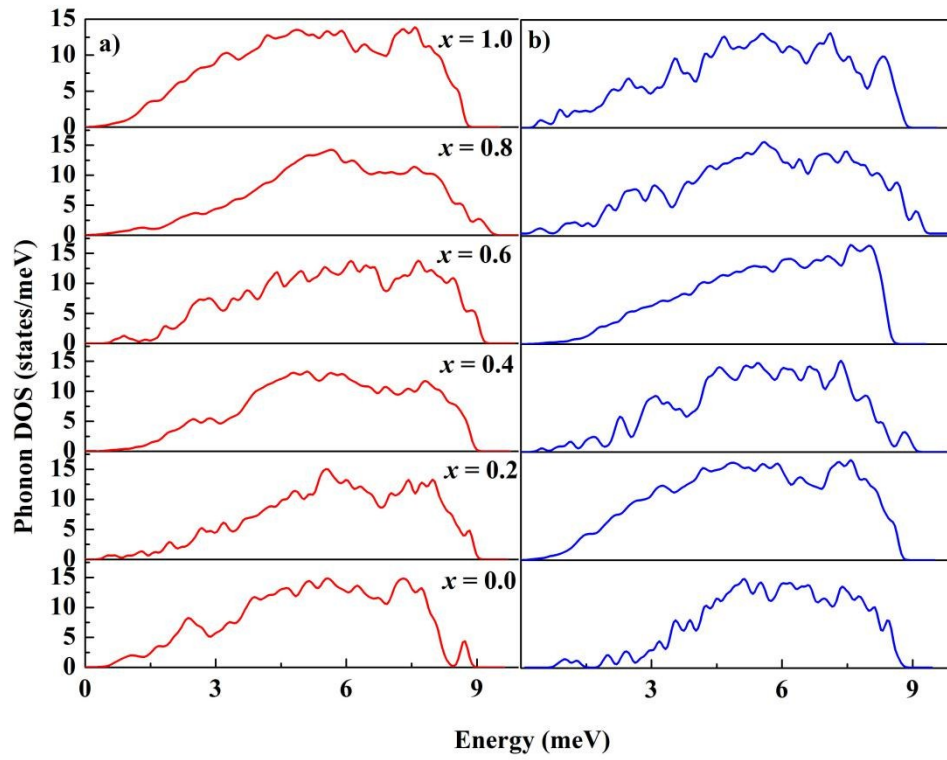

**Fig. S13** Phonon density of states for *fcc* (left) and *bcc* (right) structures.  $x$  represents the Ta content in  $\text{CoCrFeNiTa}_x$  alloys.

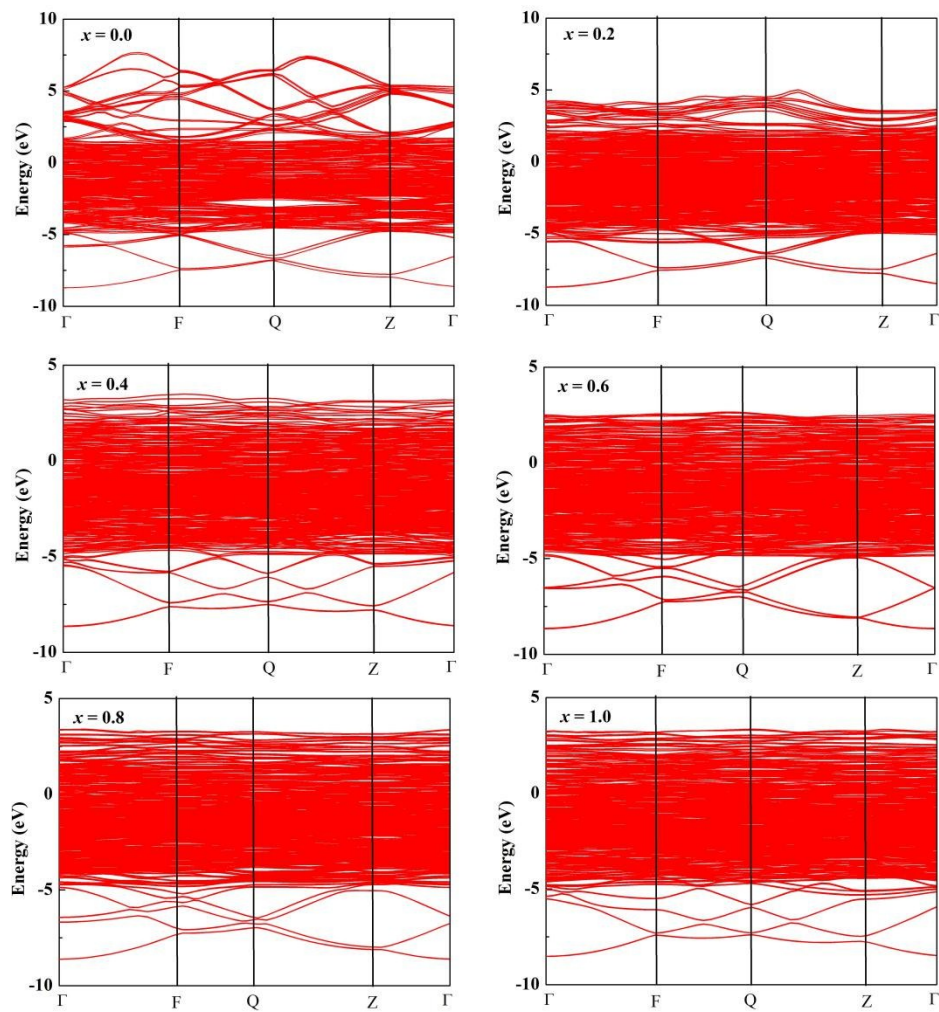

**Fig. S14** Band structures of *fcc* CoCrFeNiTa<sub>x</sub>

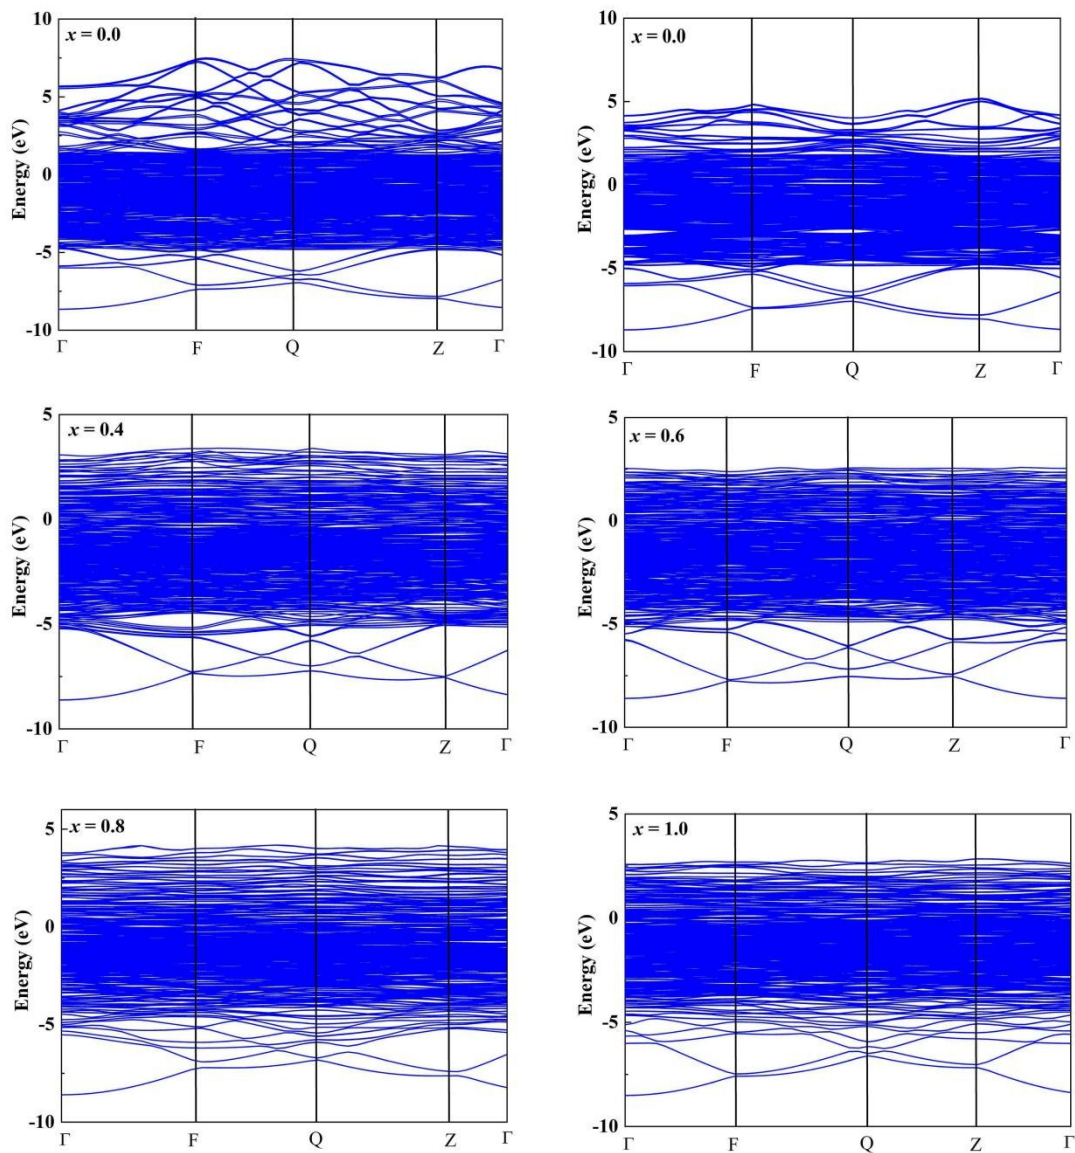

**Fig. S15** Band structures of  $bcc$  CoCrFeNiTa<sub>x</sub>

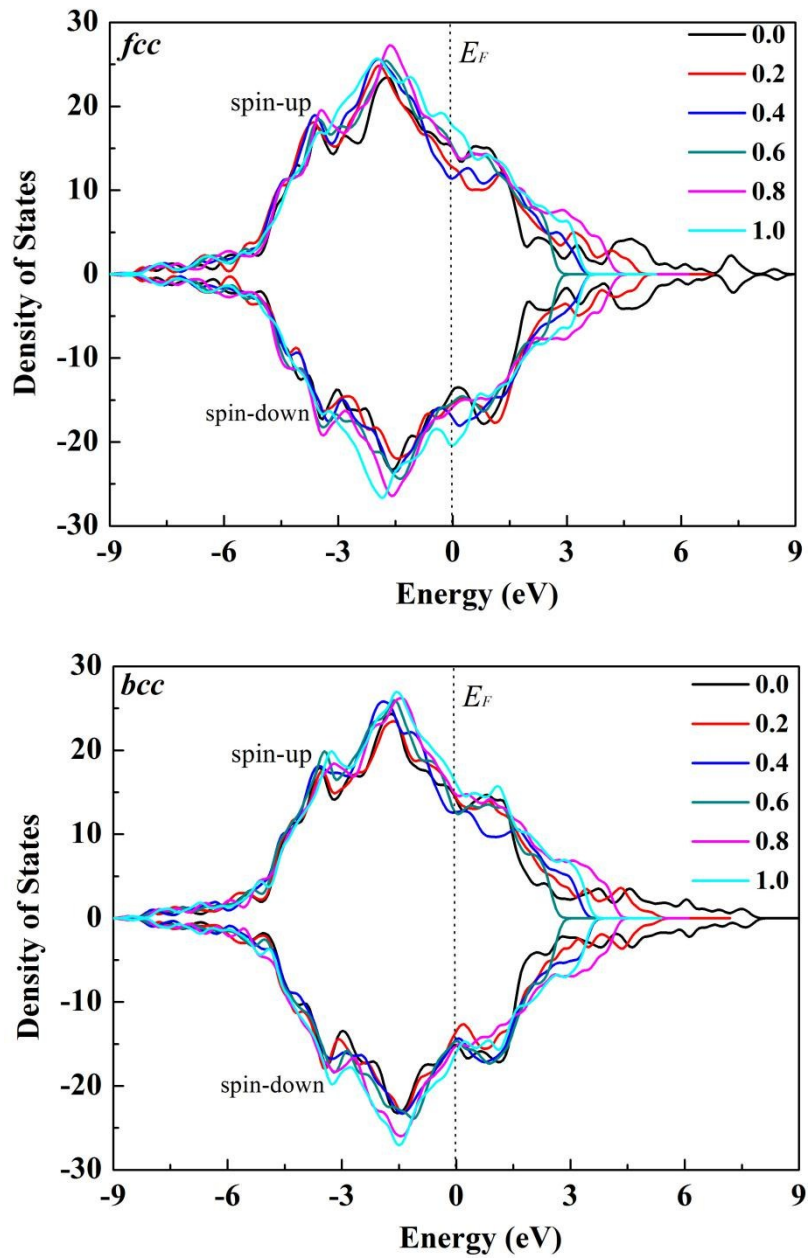

Fig. S16 Density of states of *fcc* and *bcc* CoCrFeNiTa<sub>x</sub>

## Appendix:

According to Boltzmann's hypothesis,<sup>1,2</sup> the configurational entropy of an n-element regular solution is as follows:

$$\Delta S_{con} = -R \sum_{i=1}^n (C_i \ln C_i) \quad (1)$$

where  $C_i$  is mole percent of element  $i$ ,  $\sum_{i=1}^n C_i = 1$ , and R is the ideal gas constant.

1 R.A. Swalin, *Wiley*, New York, 1972, 35-41.

2 X. Yang and Y. Zhang, *Mater. Chem. Phys.*, 2012, 132, 233-238.
